# Supplementary material for: Prevalence and Temporal Dynamics of White Line Disease in Sheep: An Exploratory Investigation into Disease Distribution and Associated Risk Factors
Source: MDPI journal article supplement (doi:10.3390/vetsci8060116), 2021-06-19
Supplement: s1 [file s1]

## Supplementary Materials

**Table S1.** Location of local MET Office weather stations for each farm in the study.

| <b>Farm</b> | <b>Weather station location</b> | <b>Approximate distance from farm (km)</b> |
|-------------|---------------------------------|--------------------------------------------|
| A           | Cardiff Bute Park, Wales        | 11.7                                       |
| B           | Oxford, South East              | 26.0                                       |
| C           | Ross-on-Wye, West Midlands      | 12.7                                       |
| D           | Ross-on-Wye, West Midlands      | 23.8                                       |

**Table S2.** Univariable analyses of the associations with the presence of WLD for 5672 foot-level observations of 400 sheep.

| Variable                                                            | <i>n</i> | %    | Odds ratio  | Lower 95% CI | Upper 95% CI | <i>p</i> |
|---------------------------------------------------------------------|----------|------|-------------|--------------|--------------|----------|
| <i>Sheep-level variables</i>                                        |          |      |             |              |              |          |
| <b>Age</b>                                                          |          |      |             |              |              |          |
| < 4 years                                                           | 3528     | 62.2 | ref         |              |              |          |
| ≥ 4 years                                                           | 2144     | 37.8 | <b>1.36</b> | 1.14         | 1.63         | 0.001    |
| <b>BCS</b>                                                          |          |      |             |              |              |          |
| 3.0                                                                 | 2816     | 49.6 | ref         |              |              |          |
| < 3.0                                                               | 828      | 14.6 | <b>0.66</b> | 0.54         | 0.80         | <0.001   |
| > 3.0                                                               | 2028     | 35.8 | <b>1.28</b> | 1.10         | 1.49         | <0.001   |
| <i>Foot-level variables</i>                                         |          |      |             |              |              |          |
| <b>Foot position</b>                                                |          |      |             |              |              |          |
| Front                                                               | 2836     | 50.0 | ref         |              |              |          |
| Back                                                                | 2836     | 50.0 | <b>1.27</b> | 1.14         | 1.42         | <0.001   |
| <b>Other feet affected by WLD</b>                                   |          |      |             |              |              |          |
| None                                                                | 1372     | 24.2 | ref         |              |              |          |
| One other                                                           | 1844     | 32.5 | <b>2.86</b> | 2.45         | 3.35         | <0.001   |
| Two others                                                          | 1535     | 27.1 | <b>4.07</b> | 3.46         | 4.79         | <0.001   |
| Three others                                                        | 921      | 16.2 | <b>9.24</b> | 7.60         | 11.25        | <0.001   |
| <b>Clinical disease</b>                                             |          |      |             |              |              |          |
| No FR disease present                                               | 5204     | 91.7 | ref         |              |              |          |
| ID and/or SFR present                                               | 468      | 8.3  | <b>2.05</b> | 1.65         | 2.56         | <0.001   |
| <i>Farm-level variables</i>                                         |          |      |             |              |              |          |
| <b>Flock size</b>                                                   |          |      |             |              |              |          |
| < 500 ewes                                                          | 1364     | 24.0 | ref         |              |              |          |
| ≥ 500 ewes                                                          | 4308     | 76.0 | 0.99        | 0.57         | 1.74         | 0.982    |
| <b>Vaccination status</b>                                           |          |      |             |              |              |          |
| Flock not vaccinated against footrot (Footvax®)                     | 2816     | 49.6 | ref         |              |              |          |
| Flock vaccinated against footrot (Footvax®)                         | 2856     | 50.4 | 0.76        | 0.51         | 1.13         | 0.174    |
| <b>Soil type</b>                                                    |          |      |             |              |              |          |
| Loamy                                                               | 1364     | 24.0 | ref         |              |              |          |
| Clay                                                                | 2856     | 50.4 | 0.94        | 0.53         | 1.66         | 0.819    |
| Loamy/clay mix                                                      | 1452     | 25.6 | 1.12        | 0.58         | 2.16         | 0.736    |
| <b>Pasture moisture (calendar month of visit) (<i>n</i> = 4512)</b> |          |      |             |              |              |          |
| Dry (“hard”)                                                        | 996      | 22.1 | ref         |              |              |          |
| Damp (“firm”)                                                       | 2064     | 45.7 | <b>1.88</b> | 1.59         | 2.23         | <0.001   |

|                                                             |      |       |             |      |      |        |
|-------------------------------------------------------------|------|-------|-------------|------|------|--------|
| Wet (“squelchy”)                                            | 1452 | 32.2  | <b>2.38</b> | 1.92 | 2.94 | <0.001 |
| Saturated (“boggy”)                                         | 0    | 0.0   | -           | -    | -    | -      |
| <b>Pasture moisture (lagged to previous calendar month)</b> |      |       |             |      |      |        |
| Dry (“hard”)                                                | 1604 | 28.3  | ref         |      |      |        |
| Damp (“firm”)                                               | 2140 | 37.7  | 0.86        | 0.74 | 1.00 | 0.054  |
| Wet (“squelchy”)                                            | 768  | 13.5  | <b>1.96</b> | 1.59 | 2.42 | <0.001 |
| Saturated (“boggy”)                                         | 1160 | 20.5  | <b>1.72</b> | 1.45 | 2.03 | <0.001 |
| <b>Pasture quality (calendar month of visit) (n = 4512)</b> |      |       |             |      |      |        |
| Lush (~ 90% leafy rye grasses)                              | 2812 | 62.3  | ref         |      |      |        |
| Average (~ 50% rye grasses)                                 | 1700 | 37.7  | <b>1.23</b> | 1.01 | 1.49 | 0.041  |
| Poor (mostly stalk and weeds)                               | 0    | 0.0   | -           | -    | -    | -      |
| <b>Pasture quality (lagged to previous calendar month)</b>  |      |       |             |      |      |        |
| Lush (~ 90% leafy rye grasses)                              | 2516 | 44.4  | ref         |      |      |        |
| Average (~ 50% rye grasses)                                 | 2760 | 48.7  | 0.92        | 0.73 | 1.18 | 0.528  |
| Poor (mostly stalk and weeds)                               | 396  | 7.0   | <b>2.53</b> | 1.78 | 3.60 | <0.001 |
| <b>Pasture type (calendar month of visit) (n = 4512)</b>    |      |       |             |      |      |        |
| Permanent grassland                                         | 1008 | 22.3  | ref         |      |      |        |
| New grass ley                                               | 752  | 16.7  | <b>2.01</b> | 1.56 | 2.60 | <0.001 |
| Mix permanent and new ley                                   | 2752 | 61.0  | <b>2.30</b> | 1.87 | 2.84 | <0.001 |
| <b>Pasture type (lagged to previous calendar month)</b>     |      |       |             |      |      |        |
| Permanent grassland                                         | 1768 | 31.2  | ref         |      |      |        |
| New grass ley                                               | 3584 | 63.2  | <b>0.66</b> | 0.52 | 0.83 | <0.001 |
| Mix permanent and new ley                                   | 320  | 5.6   | <b>0.23</b> | 0.17 | 0.32 | <0.001 |
| <b>Sward height (calendar month of visit) (n = 4512)</b>    |      |       |             |      |      |        |
| Approx. 3 cm                                                | 1876 | 41.6  | ref         |      |      |        |
| Approx. 8 cm                                                | 2324 | 51.5  | <b>2.48</b> | 2.15 | 2.86 | <0.001 |
| Approx. > 8 cm                                              | 312  | 6.9   | <b>5.50</b> | 4.04 | 7.48 | <0.001 |
| <b>Sward height (lagged to previous calendar month)</b>     |      |       |             |      |      |        |
| Approx. 3 cm                                                | 2068 | 36.5  | ref         |      |      |        |
| Approx. 8 cm                                                | 3208 | 56.6  | <b>1.19</b> | 1.02 | 1.38 | 0.027  |
| Approx. > 8 cm                                              | 396  | 7.0   | <b>0.41</b> | 0.32 | 0.53 | <0.001 |
| <b>Rainfall (calendar month of visit)</b>                   | 4512 | 100.0 | <b>0.99</b> | 0.99 | 0.99 | <0.001 |
| <b>Rainfall (lagged to previous calendar month)</b>         | 5672 | 100.0 | <b>1.03</b> | 1.03 | 1.03 | <0.001 |
| <b>Temperature (calendar month of visit)</b>                | 4512 | 100.0 | <b>0.87</b> | 0.85 | 0.89 | <0.001 |
| <b>Temperature (lagged to previous calendar month)</b>      | 5672 | 100.0 | <b>0.95</b> | 0.94 | 0.96 | <0.001 |



**Table S3.** Univariable analyses of the associations with the number of feet affected by WLD for 1086 sheep-level observations of 396 ewes affected by WLD.

| Variable                                                           | <i>n</i> | %    | $\beta$      | Lower<br>95% CI | Upper<br>95% CI | <i>p</i> |
|--------------------------------------------------------------------|----------|------|--------------|-----------------|-----------------|----------|
| <i>Sheep-level variables</i>                                       |          |      |              |                 |                 |          |
| <b>Age</b>                                                         |          |      |              |                 |                 | 0.001    |
| < 4 years                                                          | 672      | 61.9 | ref          |                 |                 |          |
| ≥ 4 years                                                          | 414      | 38.1 | <b>0.29</b>  | 0.11            | 0.46            |          |
| <b>BCS<sup>1</sup></b>                                             |          |      |              |                 |                 | 0.005    |
| 3.0                                                                | 523      | 48.2 | ref          |                 |                 |          |
| < 3.0                                                              | 149      | 13.7 | <b>-0.26</b> | -0.49           | -0.03           |          |
| > 3.0                                                              | 414      | 38.1 | 0.18         | 0.00            | 0.37            |          |
| <b>Clinical disease</b>                                            |          |      |              |                 |                 | <0.001   |
| No feet with FR disease present                                    | 920      | 84.7 | ref          |                 |                 |          |
| ≥ 1 feet with ID and/or SFR present                                | 166      | 15.3 | <b>0.35</b>  | 0.16            | 0.54            |          |
| <i>Farm-level variables</i>                                        |          |      |              |                 |                 |          |
| <b>Flock size</b>                                                  |          |      |              |                 |                 | 0.991    |
| < 500 ewes                                                         | 250      | 23.0 | ref          |                 |                 |          |
| ≥ 500 ewes                                                         | 836      | 77.0 | 0.00         | -0.75           | 0.75            |          |
| <b>Vaccination status</b>                                          |          |      |              |                 |                 | 0.341    |
| Flock not vaccinated against footrot (Footvax®)                    | 558      | 51.4 | ref          |                 |                 |          |
| Flock vaccinated against footrot (Footvax®)                        | 528      | 48.6 | -0.26        | -0.80           | 0.28            |          |
| <b>Soil type</b>                                                   |          |      |              |                 |                 | 0.953    |
| Loamy                                                              | 545      | 50.2 | ref          |                 |                 |          |
| Clay                                                               | 250      | 23.0 | 0.06         | -1.02           | 1.14            |          |
| Loamy/clay mix                                                     | 291      | 26.8 | 0.11         | -1.13           | 1.35            |          |
| <b>Pasture moisture (calendar month of visit) (<i>n</i> = 838)</b> |          |      |              |                 |                 | <0.001   |
| Dry (“hard”)                                                       | 159      | 19.0 | ref          |                 |                 |          |
| Damp (“firm”)                                                      | 394      | 47.0 | <b>0.52</b>  | 0.31            | 0.73            |          |
| Wet (“squelchy”)                                                   | 285      | 34.0 | <b>0.71</b>  | 0.45            | 0.98            |          |
| Saturated (“boggy”)                                                | 0        | 0.0  | -            | -               | -               | -        |
| <b>Pasture moisture (lagged to previous calendar month)</b>        |          |      |              |                 |                 | <0.001   |
| Dry (“hard”)                                                       | 293      | 27.0 | ref          |                 |                 |          |
| Damp (“firm”)                                                      | 383      | 35.3 | -0.15        | -0.34           | 0.05            |          |
| Wet (“squelchy”)                                                   | 162      | 14.9 | <b>0.59</b>  | 0.32            | 0.86            |          |
| Saturated (“boggy”)                                                | 248      | 22.8 | <b>0.47</b>  | 0.25            | 0.68            |          |
| <b>Pasture quality (calendar month of visit) (<i>n</i> = 838)</b>  |          |      |              |                 |                 | 0.176    |

|                                                            |      |       |              |       |       |        |
|------------------------------------------------------------|------|-------|--------------|-------|-------|--------|
| Lush (~ 90% leafy rye grasses)                             | 559  | 66.7  | ref          |       |       |        |
| Average (~ 50% rye grasses)                                | 279  | 33.3  | 0.17         | -0.08 | 0.41  |        |
| Poor (mostly stalk and weeds)                              | 0    | 0.0   | -            | -     | -     | -      |
| <b>Pasture quality (lagged to previous calendar month)</b> |      |       |              |       |       | <0.001 |
| Lush (~ 90% leafy rye grasses)                             | 525  | 48.3  | ref          |       |       |        |
| Average (~ 50% rye grasses)                                | 473  | 43.6  | -0.11        | -0.41 | 0.19  |        |
| Poor (mostly stalk and weeds)                              | 88   | 8.1   | <b>0.77</b>  | 0.34  | 1.21  |        |
| <b>Pasture type (calendar month of visit) (n = 838)</b>    |      |       |              |       |       | <0.001 |
| Permanent grassland                                        | 149  | 17.8  | ref          |       |       |        |
| New grass ley                                              | 135  | 16.1  | <b>0.59</b>  | 0.32  | 0.85  |        |
| Mix permanent and new ley                                  | 554  | 66.1  | <b>0.74</b>  | 0.54  | 0.94  |        |
| <b>Pasture type (lagged to previous calendar month)</b>    |      |       |              |       |       | <0.001 |
| Permanent grassland                                        | 335  | 30.8  | ref          |       |       |        |
| New grass ley                                              | 718  | 66.1  | <b>-0.36</b> | -0.64 | -0.09 |        |
| Mix permanent and new ley                                  | 30   | 3.0   | <b>-1.09</b> | -1.43 | -0.75 |        |
| <b>Sward height (calendar month of visit) (n = 838)</b>    |      |       |              |       |       | <0.001 |
| Approx. 3 cm                                               | 296  | 35.3  | ref          |       |       |        |
| Approx. 8 cm                                               | 474  | 56.6  | <b>0.79</b>  | 0.62  | 0.96  |        |
| Approx. > 8 cm                                             | 68   | 8.1   | <b>1.46</b>  | 1.11  | 1.81  |        |
| <b>Sward height (lagged to previous calendar month)</b>    |      |       |              |       |       | <0.001 |
| Approx. 3 cm                                               | 400  | 36.8  | ref          |       |       |        |
| Approx. 8 cm                                               | 608  | 56.0  | 0.15         | -0.05 | 0.34  |        |
| Approx. > 8 cm                                             | 78   | 7.2   | <b>-0.80</b> | -1.13 | -0.48 |        |
| <b>Rainfall (calendar month of visit)</b>                  | 5672 | 100.0 | <b>-0.01</b> | -0.01 | -0.01 | <0.001 |
| <b>Rainfall (lagged to previous calendar month)</b>        | 5672 | 100.0 | <b>-0.12</b> | -0.15 | -0.09 | <0.001 |
| <b>Temperature (calendar month of visit)</b>               | 5672 | 100.0 | <b>0.03</b>  | 0.02  | 0.03  | <0.001 |
| <b>Temperature (lagged to previous calendar month)</b>     | 5672 | 100.0 | <b>-0.05</b> | -0.06 | -0.04 | <0.001 |
| <i>Time variable</i>                                       |      |       |              |       |       |        |
| <b>Visit</b>                                               |      |       |              |       |       | <0.001 |
| 1 (Sep 2019)                                               | 263  | 24.2  | ref          |       |       |        |
| 2 (Jan 2020)                                               | 329  | 30.3  | <b>0.99</b>  | 0.81  | 1.17  |        |
| 3 (Jul 2020)                                               | 225  | 20.7  | -0.04        | -0.22 | 0.14  |        |
| 4 (Sep 2020)                                               | 269  | 24.8  | <b>1.21</b>  | 1.02  | 1.40  |        |

β: estimate; CI: confidence interval for estimate; bold estimates are statistically significant at 0.05 as their CIs do not include 0; ref: baseline category for comparison.

**Table S4.** Univariable analyses of the associations with the development of WLD at foot-level for 1014 observations of 351 ewes during transition period 1 (Sep 2019 – Jan 2020).

| Variable                                        | <i>n</i> | %    | Odds ratio  | Lower 95% CI | Upper 95% CI | <i>p</i> |
|-------------------------------------------------|----------|------|-------------|--------------|--------------|----------|
| <b><i>Sheep-level variables</i></b>             |          |      |             |              |              |          |
| <b>Age</b>                                      |          |      |             |              |              |          |
| < 4 years                                       | 661      | 65.2 | ref         |              |              |          |
| ≥ 4 years                                       | 353      | 34.8 | <b>1.72</b> | 1.04         | 2.83         | 0.033    |
| <b>Change in BCS</b>                            |          |      |             |              |              |          |
| Same condition                                  | 626      | 61.7 | ref         |              |              |          |
| Gained condition                                | 164      | 16.2 | 1.09        | 0.60         | 1.97         | 0.781    |
| Lost condition                                  | 224      | 22.1 | 0.85        | 0.50         | 1.46         | 0.559    |
| <b><i>Foot-level variables</i></b>              |          |      |             |              |              |          |
| <b>Foot position</b>                            |          |      |             |              |              |          |
| Front                                           | 497      | 49.0 | ref         |              |              |          |
| Back                                            | 517      | 51.0 | 1.13        | 0.84         | 1.51         | 0.429    |
| <b>Other feet develop WLD</b>                   |          |      |             |              |              |          |
| None                                            | 284      | 28.0 | ref         |              |              |          |
| One other                                       | 308      | 30.4 | <b>2.38</b> | 1.70         | 3.33         | <0.001   |
| Two others                                      | 278      | 27.4 | <b>4.85</b> | 3.38         | 6.95         | <0.001   |
| Three others                                    | 144      | 14.2 | <b>6.63</b> | 4.14         | 10.62        | <0.001   |
| <b>Clinical disease (First month of T1)</b>     |          |      |             |              |              |          |
| No FR disease present                           | 954      | 94.1 | ref         |              |              |          |
| ID and/or SFR present                           | 60       | 5.9  | 1.00        | 0.48         | 2.09         | 0.984    |
| <b>Clinical disease (Last month of T1)</b>      |          |      |             |              |              |          |
| No FR disease present                           | 914      | 90.1 | ref         |              |              |          |
| ID and/or SFR present                           | 100      | 9.9  | <b>1.99</b> | 1.07         | 3.71         | 0.031    |
| <b><i>Farm-level variables</i></b>              |          |      |             |              |              |          |
| <b>Flock size</b>                               |          |      |             |              |              |          |
| < 500 ewes                                      | 289      | 28.5 | ref         |              |              |          |
| ≥ 500 ewes                                      | 725      | 71.5 | <b>0.42</b> | 0.41         | 0.42         | <0.001   |
| <b>Vaccination status</b>                       |          |      |             |              |              |          |
| Flock not vaccinated against footrot (Footvax®) | 524      | 51.7 | ref         |              |              |          |
| Flock vaccinated against footrot (Footvax®)     | 490      | 48.3 | <b>0.46</b> | 0.30         | 0.69         | <0.001   |
| <b>Soil type</b>                                |          |      |             |              |              |          |
| Loamy                                           | 289      | 28.5 | ref         |              |              |          |
| Clay                                            | 528      | 52.1 | <b>2.21</b> | 2.20         | 2.21         | <0.001   |
| Loamy/clay mix                                  | 197      | 19.4 | <b>0.74</b> | 0.74         | 0.74         | <0.001   |

|                                              |      |       |             |      |      |        |
|----------------------------------------------|------|-------|-------------|------|------|--------|
| <b>Pasture moisture (First month of T1)</b>  |      |       |             |      |      |        |
| Dry (“hard”)                                 | 0    | 0.0   | -           | -    | -    | -      |
| Damp (“firm”)                                | 528  | 52.1  | ref         |      |      |        |
| Wet (“squelchy”)                             | 486  | 47.9  | 1.28        | 0.60 | 2.73 | 0.520  |
| Saturated (“boggy”)                          | 0    | 0.0   | -           | -    | -    | -      |
| <b>Pasture quality (First month of T1)</b>   |      |       |             |      |      |        |
| Lush (~ 90% leafy rye grasses)               | 721  | 71.1  | ref         |      |      |        |
| Average (~ 50% rye grasses)                  | 293  | 28.9  | 0.66        | 0.29 | 1.48 | 0.311  |
| Poor (mostly stalk and weeds)                | 0    | 0.0   | -           | -    | -    | -      |
| <b>Pasture type (First month of T1)</b>      |      |       |             |      |      |        |
| Permanent grassland                          | 293  | 28.9  | ref         |      |      |        |
| New grass ley                                | 289  | 28.5  | <b>2.63</b> | 2.62 | 2.64 | <0.001 |
| Mix permanent and new ley                    | 432  | 42.6  | <b>1.16</b> | 1.15 | 1.16 | <0.001 |
| <b>Sward height (First month of T1)</b>      |      |       |             |      |      |        |
| Approx. 3 cm                                 | 293  | 28.9  | ref         |      |      |        |
| Approx. 8 cm                                 | 721  | 71.1  | 1.52        | 0.68 | 3.39 | 0.311  |
| Approx. > 8cm                                | 0    | 0.0   | -           | -    | -    | -      |
| <b>Rainfall (calendar month of visit)</b>    | 1014 | 100.0 | 1.00        | 0.99 | 1.01 | 0.053  |
| <b>Temperature (calendar month of visit)</b> | 1014 | 100.0 | 0.43        | 0.07 | 2.67 | 0.364  |

CI: confidence interval for odds ratio; bold odds ratios are statistically significant at 0.05 as their CIs do not include 1; ref: baseline category for comparison.



**Table S5.** Univariable analyses of the associations with the recovery from WLD at foot-level for 514 observations of 256 ewes during transition period 1 (Sep 2019 – Jan 2020).

| Variable                                        | <i>n</i> | %    | Odds ratio  | Lower 95% CI | Upper 95% CI | <i>p</i> |
|-------------------------------------------------|----------|------|-------------|--------------|--------------|----------|
| <b><i>Sheep-level variables</i></b>             |          |      |             |              |              |          |
| <b>Age</b>                                      |          |      |             |              |              |          |
| < 4 years                                       | 279      | 54.3 | ref         |              |              |          |
| ≥ 4 years                                       | 235      | 45.7 | 0.81        | 0.46         | 1.44         | 0.477    |
| <b>Change in BCS</b>                            |          |      |             |              |              |          |
| Same condition                                  | 290      | 56.4 | ref         |              |              |          |
| Gained condition                                | 72       | 14.0 | 1.16        | 0.52         | 2.58         | 0.709    |
| Lost condition                                  | 152      | 29.6 | 0.75        | 0.38         | 1.48         | 0.408    |
| <b><i>Foot-level variables</i></b>              |          |      |             |              |              |          |
| <b>Foot position</b>                            |          |      |             |              |              |          |
| Front                                           | 267      | 51.9 | ref         |              |              |          |
| Back                                            | 247      | 48.1 | 1.17        | 0.76         | 1.79         | 0.483    |
| <b>Other feet recover from WLD</b>              |          |      |             |              |              |          |
| None                                            | 309      | 60.1 | ref         |              |              |          |
| One other                                       | 119      | 23.2 | <b>1.95</b> | 1.24         | 3.07         | 0.004    |
| Two others                                      | 65       | 12.6 | <b>4.38</b> | 2.42         | 7.94         | <0.001   |
| Three others                                    | 21       | 4.1  | <b>7.25</b> | 2.49         | 21.10        | <0.001   |
| <b>Clinical disease (First month of T1)</b>     |          |      |             |              |              |          |
| No FR disease present                           | 467      | 90.9 | ref         |              |              |          |
| ID and/or SFR present                           | 47       | 9.1  | 1.39        | 0.59         | 3.25         | 0.447    |
| <b>Clinical disease (Last month of T1)</b>      |          |      |             |              |              |          |
| No FR disease present                           | 432      | 84.0 | ref         |              |              |          |
| ID and/or SFR present                           | 82       | 16.0 | 0.77        | 0.38         | 1.57         | 0.470    |
| <b><i>Farm-level variables</i></b>              |          |      |             |              |              |          |
| <b>Flock size</b>                               |          |      |             |              |              |          |
| < 500 ewes                                      | 83       | 16.1 | ref         |              |              |          |
| ≥ 500 ewes                                      | 431      | 83.9 | 1.83        | 0.61         | 5.47         | 0.283    |
| <b>Vaccination status</b>                       |          |      |             |              |              |          |
| Flock not vaccinated against footrot (Footvax®) | 224      | 43.6 | ref         |              |              |          |
| Flock vaccinated against footrot (Footvax®)     | 290      | 56.4 | <b>2.77</b> | 1.60         | 4.80         | <0.001   |
| <b>Soil type</b>                                |          |      |             |              |              |          |
| Loamy                                           | 83       | 16.1 | ref         |              |              |          |
| Clay                                            | 240      | 46.7 | 1.22        | 0.38         | 3.96         | 0.453    |
| Loamy/clay mix                                  | 191      | 37.2 | <b>2.94</b> | 1.63         | 5.32         | <0.001   |

|                                              |     |       |              |      |       |        |
|----------------------------------------------|-----|-------|--------------|------|-------|--------|
| <b>Pasture moisture (First month of T1)</b>  |     |       |              |      |       |        |
| Dry (“hard”)                                 | 0   | 0.0   | -            | -    | -     | -      |
| Damp (“firm”)                                | 240 | 46.7  | ref          |      |       |        |
| Wet (“squelchy”)                             | 274 | 53.3  | 1.65         | 0.68 | 3.97  | 0.267  |
| Saturated (“boggy”)                          | 0   | 0.0   | -            | -    | -     | -      |
| <b>Pasture quality (First month of T1)</b>   |     |       |              |      |       |        |
| Lush (~ 90% leafy rye grasses)               | 415 | 80.7  | ref          |      |       |        |
| Average (~ 50% rye grasses)                  | 99  | 19.3  | 1.02         | 0.31 | 3.37  | 0.975  |
| Poor (mostly stalk and weeds)                | 0   | 0.0   | -            | -    | -     | -      |
| <b>Pasture type (First month of T1)</b>      |     |       |              |      |       |        |
| Permanent grassland                          | 99  | 19.3  | ref          |      |       |        |
| New grass ley                                | 83  | 16.1  | 0.62         | 0.16 | 2.35  | 0.483  |
| Mix permanent and new ley                    | 332 | 64.6  | 1.20         | 0.40 | 3.62  | 0.750  |
| <b>Sward height (First month of T1)</b>      |     |       |              |      |       |        |
| Approx. 3 cm                                 | 99  | 19.3  | ref          |      |       |        |
| Approx. 8 cm                                 | 415 | 90.7  | 0.98         | 0.30 | 3.24  | 0.975  |
| Approx. > 8cm                                | 0   | 0.0   | -            | -    | -     | -      |
| <b>Rainfall (calendar month of visit)</b>    | 514 | 100.0 | <b>1.02</b>  | 1.01 | 1.02  | <0.001 |
| <b>Temperature (calendar month of visit)</b> | 514 | 100.0 | <b>10.02</b> | 3.10 | 32.43 | <0.001 |

CI: confidence interval for odds ratio; bold odds ratios are statistically significant at 0.05 as their CIs do not include 1; ref: baseline category for comparison.

**Table S6.** Univariable analyses of the associations with the development of WLD at foot-level for 530 observations of 235 ewes during transition period 2 (Jan 2020 – Jul 2020).

| Variable                                        | <i>n</i> | %    | Odds ratio  | Lower 95% CI | Upper 95% CI | <i>p</i> |
|-------------------------------------------------|----------|------|-------------|--------------|--------------|----------|
| <b><i>Sheep-level variables</i></b>             |          |      |             |              |              |          |
| <b>Age</b>                                      |          |      |             |              |              |          |
| < 4 years                                       | 354      | 66.8 | ref         |              |              |          |
| ≥ 4 years                                       | 176      | 33.2 | 0.81        | 0.46         | 1.43         | 0.465    |
| <b>Change in BCS</b>                            |          |      |             |              |              |          |
| Same condition                                  | 261      | 49.2 | ref         |              |              |          |
| Gained condition                                | 116      | 21.9 | <b>0.44</b> | 0.20         | 0.96         | 0.038    |
| Lost condition                                  | 153      | 28.9 | 0.80        | 0.40         | 1.62         | 0.543    |
| <b><i>Foot-level variables</i></b>              |          |      |             |              |              |          |
| <b>Foot position</b>                            |          |      |             |              |              |          |
| Front                                           | 264      | 49.8 | ref         |              |              |          |
| Back                                            | 266      | 50.2 | <b>1.65</b> | 1.06         | 2.54         | 0.025    |
| <b>Other feet develop WLD</b>                   |          |      |             |              |              |          |
| None                                            | 332      | 62.6 | ref         |              |              |          |
| One other                                       | 145      | 27.4 | <b>2.29</b> | 1.48         | 3.56         | <0.001   |
| Two others                                      | 42       | 7.9  | <b>2.27</b> | 1.14         | 4.51         | 0.019    |
| Three others                                    | 11       | 2.1  | <b>7.58</b> | 1.92         | 30.02        | 0.004    |
| <b>Clinical disease (First month of T2)</b>     |          |      |             |              |              |          |
| No FR disease present                           | 481      | 90.8 | ref         |              |              |          |
| ID and/or SFR present                           | 49       | 9.2  | 1.45        | 0.64         | 3.27         | 0.371    |
| <b>Clinical disease (Last month of T2)</b>      |          |      |             |              |              |          |
| No FR disease present                           | 523      | 98.7 | ref         |              |              |          |
| ID and/or SFR present                           | 7        | 1.3  | 3.58        | 0.50         | 25.68        | 0.204    |
| <b><i>Farm-level variables</i></b>              |          |      |             |              |              |          |
| <b>Flock size</b>                               |          |      |             |              |              |          |
| < 500 ewes                                      | 85       | 16.0 | ref         |              |              |          |
| ≥ 500 ewes                                      | 445      | 84.0 | 0.81        | 0.15         | 4.39         | 0.805    |
| <b>Vaccination status</b>                       |          |      |             |              |              |          |
| Flock not vaccinated against footrot (Footvax®) | 206      | 38.9 | ref         |              |              |          |
| Flock vaccinated against footrot (Footvax®)     | 324      | 61.1 | 0.35        | 0.12         | 1.01         | 0.053    |
| <b>Soil type</b>                                |          |      |             |              |              |          |
| Loamy                                           | 85       | 16.0 | ref         |              |              |          |
| Clay                                            | 265      | 50.0 | 1.38        | 0.24         | 8.11         | 0.720    |
| Loamy/clay mix                                  | 180      | 34.0 | 1.38        | 0.25         | 7.68         | 0.713    |

|                                              |     |       |             |      |        |        |
|----------------------------------------------|-----|-------|-------------|------|--------|--------|
| <b>Pasture moisture (Last month of T2)</b>   |     |       |             |      |        |        |
| Dry (“hard”)                                 | 0   | 0.0   | -           | -    | -      | -      |
| Damp (“firm”)                                | 350 | 66.0  | ref         |      |        |        |
| Wet (“squelchy”)                             | 180 | 34.0  | 1.25        | 0.24 | 6.50   | 0.792  |
| Saturated (“boggy”)                          | 0   | 0.0   | -           | -    | -      | -      |
| <b>Pasture quality (Last month of T2)</b>    |     |       |             |      |        |        |
| Lush (~ 90% leafy rye grasses)               | 301 | 56.8  | ref         |      |        |        |
| Average (~ 50% rye grasses)                  | 85  | 16.0  | 0.73        | 0.35 | 1.49   | 0.383  |
| Poor (mostly stalk and weeds)                | 144 | 27.2  | <b>0.17</b> | 0.08 | 0.36   | <0.001 |
| <b>Pasture type (Last month of T2)</b>       |     |       |             |      |        |        |
| Permanent grassland                          | 144 | 27.2  | ref         |      |        |        |
| New grass ley                                | 0   | 0.0   | -           | -    | -      | -      |
| Mix permanent and new ley                    | 386 | 72.8  | <b>5.41</b> | 2.62 | 11.18  | <0.001 |
| <b>Sward height (Last month of T2)</b>       |     |       |             |      |        |        |
| Approx. 3 cm                                 | 206 | 38.9  | ref         |      |        |        |
| Approx. 8 cm                                 | 324 | 61.1  | 0.35        | 0.12 | 1.01   | 0.053  |
| Approx. > 8 cm                               | 0   | 0.0   | -           | -    | -      | -      |
| <b>Rainfall (calendar month of visit)</b>    | 530 | 100.0 | 1.00        | 0.97 | 1.04   | 0.880  |
| <b>Temperature (calendar month of visit)</b> | 530 | 100.0 | 2.16        | 0.02 | 200.44 | 0.739  |

CI: confidence interval for odds ratio; bold odds ratios are statistically significant at 0.05 as their CIs do not include 1; ref: baseline category for comparison.

**Table S7.** Univariable analyses of the associations with the recovery from WLD at foot-level for 762 observations of 275 ewes during transition period 2 (Jan 2020 – Jul 2020).

| Variable                                        | <i>n</i> | %    | Odds ratio  | Lower 95% CI | Upper 95% CI | <i>p</i> |
|-------------------------------------------------|----------|------|-------------|--------------|--------------|----------|
| <b><i>Sheep-level variables</i></b>             |          |      |             |              |              |          |
| <b>Age</b>                                      |          |      |             |              |              |          |
| < 4 years                                       | 458      | 60.1 | ref         |              |              |          |
| ≥ 4 years                                       | 304      | 39.9 | 1.18        | 0.71         | 1.97         | 0.530    |
| <b>Change in BCS</b>                            |          |      |             |              |              |          |
| Same condition                                  | 327      | 42.9 | ref         |              |              |          |
| Gained condition                                | 212      | 27.8 | 1.09        | 0.54         | 2.18         | 0.818    |
| Lost condition                                  | 223      | 29.3 | 1.09        | 0.60         | 1.95         | 0.785    |
| <b><i>Foot-level variables</i></b>              |          |      |             |              |              |          |
| <b>Foot position</b>                            |          |      |             |              |              |          |
| Front                                           | 382      | 50.1 | ref         |              |              |          |
| Back                                            | 380      | 49.9 | <b>0.57</b> | 0.40         | 0.81         | 0.002    |
| <b>Other feet recover from WLD</b>              |          |      |             |              |              |          |
| None                                            | 168      | 22.0 | ref         |              |              |          |
| One other                                       | 241      | 31.6 | <b>2.04</b> | 1.35         | 3.07         | 0.004    |
| Two others                                      | 214      | 28.1 | <b>2.69</b> | 1.74         | 4.16         | <0.001   |
| Three others                                    | 139      | 18.2 | <b>5.82</b> | 3.36         | 10.07        | <0.001   |
| <b>Clinical disease (First month of T2)</b>     |          |      |             |              |              |          |
| No FR disease present                           | 649      | 85.2 | ref         |              |              |          |
| ID and/or SFR present                           | 113      | 14.8 | 0.62        | 0.34         | 1.11         | 0.107    |
| <b>Clinical disease (Last month of T2)</b>      |          |      |             |              |              |          |
| No FR disease present                           | 747      | 98.0 | ref         |              |              |          |
| ID and/or SFR present                           | 15       | 2.0  | 0.32        | 0.08         | 1.39         | 0.129    |
| <b><i>Farm-level variables</i></b>              |          |      |             |              |              |          |
| <b>Flock size</b>                               |          |      |             |              |              |          |
| < 500 ewes                                      | 195      | 25.6 | ref         |              |              |          |
| ≥ 500 ewes                                      | 567      | 74.4 | 0.84        | 0.25         | 2.84         | 0.774    |
| <b>Vaccination status</b>                       |          |      |             |              |              |          |
| Flock not vaccinated against footrot (Footvax®) | 418      | 54.9 | ref         |              |              |          |
| Flock vaccinated against footrot (Footvax®)     | 344      | 45.1 | 1.88        | 0.78         | 4.52         | 0.159    |
| <b>Soil type</b>                                |          |      |             |              |              |          |
| Loamy                                           | 195      | 25.6 | ref         |              |              |          |
| Clay                                            | 391      | 51.3 | 1.12        | 0.31         | 4.05         | 0.863    |
| Loamy/clay mix                                  | 176      | 23.1 | 0.82        | 0.23         | 2.96         | 0.761    |

|                                              |     |       |             |      |       |        |
|----------------------------------------------|-----|-------|-------------|------|-------|--------|
| <b>Pasture moisture (Last month of T2)</b>   |     |       |             |      |       |        |
| Dry (“hard”)                                 | 0   | 0.0   | -           | -    | -     | -      |
| Damp (“firm”)                                | 586 | 76.9  | ref         |      |       |        |
| Wet (“squelchy”)                             | 176 | 23.1  | 0.80        | 0.23 | 2.78  | 0.722  |
| Saturated (“boggy”)                          | 0   | 0.0   | -           | -    | -     | -      |
| <b>Pasture quality (Last month of T2)</b>    |     |       |             |      |       |        |
| Lush (~ 90% leafy rye grasses)               | 399 | 52.4  | ref         |      |       |        |
| Average (~ 50% rye grasses)                  | 195 | 25.6  | <b>1.76</b> | 1.01 | 3.07  | 0.045  |
| Poor (mostly stalk and weeds)                | 168 | 22.0  | <b>4.08</b> | 2.17 | 7.68  | <0.001 |
| <b>Pasture type (Last month of T2)</b>       |     |       |             |      |       |        |
| Permanent grassland                          | 168 | 22.0  | ref         |      |       |        |
| New grass ley                                | 0   | 0.0   | -           | -    | -     | -      |
| Mix permanent and new ley                    | 594 | 78.0  | <b>0.30</b> | 0.15 | 0.60  | 0.001  |
| <b>Sward height (Last month of T2)</b>       |     |       |             |      |       |        |
| Approx. 3 cm                                 | 418 | 54.9  | ref         |      |       |        |
| Approx. 8 cm                                 | 344 | 45.1  | 1.99        | 0.84 | 4.73  | 0.120  |
| Approx. > 8 cm                               | 0   | 0.0   | -           | -    | -     | -      |
| <b>Rainfall (calendar month of visit)</b>    | 762 | 100.0 | 1.00        | 0.97 | 1.02  | 0.725  |
| <b>Temperature (calendar month of visit)</b> | 762 | 100.0 | 1.12        | 0.05 | 25.94 | 0.944  |

CI: confidence interval for odds ratio; bold odds ratios are statistically significant at 0.05 as their CIs do not include 1; ref: baseline category for comparison.

**Table S8.** Univariable analyses of the associations with the development of WLD at foot-level for 815 observations of 286 ewes during transition period 3 (Jul 2020 – Sep 2020).

| Variable                                        | <i>n</i> | %    | Odds ratio   | Lower 95% CI | Upper 95% CI | <i>p</i> |
|-------------------------------------------------|----------|------|--------------|--------------|--------------|----------|
| <i>Sheep-level variables</i>                    |          |      |              |              |              |          |
| <b>Age</b>                                      |          |      |              |              |              |          |
| < 4 years                                       | 505      | 62.0 | ref          |              |              |          |
| ≥ 4 years                                       | 310      | 38.0 | <b>1.80</b>  | 1.09         | 2.98         | 0.022    |
| <b>Change in BCS</b>                            |          |      |              |              |              |          |
| Same condition                                  | 363      | 44.5 | ref          |              |              |          |
| Gained condition                                | 210      | 25.8 | 1.79         | 0.97         | 3.27         | 0.060    |
| Lost condition                                  | 242      | 29.7 | 1.22         | 0.69         | 2.16         | 0.499    |
| <i>Foot-level variables</i>                     |          |      |              |              |              |          |
| <b>Foot position</b>                            |          |      |              |              |              |          |
| Front                                           | 380      | 46.6 | ref          |              |              |          |
| Back                                            | 435      | 53.4 | <b>2.31</b>  | 1.60         | 3.35         | <0.001   |
| <b>Other feet develop WLD</b>                   |          |      |              |              |              |          |
| None                                            | 204      | 25.0 | ref          |              |              |          |
| One other                                       | 233      | 28.6 | <b>4.06</b>  | 2.71         | 6.08         | <0.001   |
| Two others                                      | 237      | 29.1 | <b>3.53</b>  | 2.37         | 5.26         | <0.001   |
| Three others                                    | 141      | 17.3 | <b>11.07</b> | 6.37         | 19.23        | <0.001   |
| <b>Clinical disease (First month of T3)</b>     |          |      |              |              |              |          |
| No FR disease present                           | 807      | 99.0 | ref          |              |              |          |
| ID and/or SFR present                           | 8        | 1.0  | 6.67         | 0.44         | 100.45       | 0.170    |
| <b>Clinical disease (Last month of T3)</b>      |          |      |              |              |              |          |
| No FR disease present                           | 727      | 89.2 | ref          |              |              |          |
| ID and/or SFR present                           | 88       | 10.8 | <b>2.69</b>  | 1.20         | 6.01         | 0.016    |
| <i>Farm-level variables</i>                     |          |      |              |              |              |          |
| <b>Flock size</b>                               |          |      |              |              |              |          |
| < 500 ewes                                      | 208      | 25.5 | ref          |              |              |          |
| ≥ 500 ewes                                      | 607      | 74.5 | 0.85         | 0.47         | 1.54         | 0.597    |
| <b>Vaccination status</b>                       |          |      |              |              |              |          |
| Flock not vaccinated against footrot (Footvax®) | 367      | 45.0 | ref          |              |              |          |
| Flock vaccinated against footrot (Footvax®)     | 448      | 55.0 | 0.80         | 0.48         | 1.34         | 0.392    |
| <b>Soil type</b>                                |          |      |              |              |              |          |
| Loamy                                           | 208      | 25.5 | ref          |              |              |          |
| Clay                                            | 402      | 49.3 | 0.73         | 0.39         | 1.36         | 0.322    |
| Loamy/clay mix                                  | 205      | 25.2 | 1.15         | 0.56         | 2.35         | 0.703    |

|                                              |     |       |             |      |      |       |
|----------------------------------------------|-----|-------|-------------|------|------|-------|
| <b>Pasture moisture (First month of T3)</b>  |     |       |             |      |      |       |
| Dry (“hard”)                                 | 610 | 74.8  | ref         |      |      |       |
| Damp (“firm”)                                | 205 | 25.2  | 1.37        | 0.78 | 2.41 | 0.267 |
| Wet (“squelchy”)                             | 0   | 0.0   | -           | -    | -    | -     |
| Saturated (“boggy”)                          | 0   | 0.0   | -           | -    | -    | -     |
| <b>Pasture moisture (Last month of T3)</b>   |     |       |             |      |      |       |
| Dry (“hard”)                                 | 0   | 0.0   | -           | -    | -    | -     |
| Damp (“firm”)                                | 610 | 74.8  | ref         |      |      |       |
| Wet (“squelchy”)                             | 205 | 25.2  | 1.37        | 0.78 | 2.41 | 0.267 |
| Saturated (“boggy”)                          | 0   | 0.0   | -           | -    | -    | -     |
| <b>Pasture quality (First month of T3)</b>   |     |       |             |      |      |       |
| Lush (~ 90% leafy rye grasses)               | 364 | 44.7  | ref         |      |      |       |
| Average (~ 50% rye grasses)                  | 208 | 25.5  | 1.05        | 0.73 | 1.50 | 0.791 |
| Poor (mostly stalk and weeds)                | 243 | 29.8  | <b>0.67</b> | 0.48 | 0.94 | 0.019 |
| <b>Pasture quality (Last month of T3)</b>    |     |       |             |      |      |       |
| Lush (~ 90% leafy rye grasses)               | 607 | 74.5  | ref         |      |      |       |
| Average (~ 50% rye grasses)                  | 208 | 25.5  | 1.29        | 0.74 | 2.26 | 0.372 |
| Poor (mostly stalk and weeds)                | 0   | 0.0   | -           | -    | -    | -     |
| <b>Pasture type (First month of T3)</b>      |     |       |             |      |      |       |
| Permanent grassland                          | 243 | 29.8  | ref         |      |      |       |
| New grass ley                                | 0   | 0.0   | -           | -    | -    | -     |
| Mix permanent and new ley                    | 572 | 70.2  | <b>1.51</b> | 1.12 | 2.06 | 0.008 |
| <b>Pasture type (Last month of T3)</b>       |     |       |             |      |      |       |
| Permanent grassland                          | 243 | 29.8  | ref         |      |      |       |
| New grass ley                                | 0   | 0.0   | -           | -    | -    | -     |
| Mix permanent and new ley                    | 572 | 70.2  | <b>1.90</b> | 1.11 | 3.26 | 0.020 |
| <b>Sward height (First month of T3)</b>      |     |       |             |      |      |       |
| Approx. 3 cm                                 | 367 | 45.0  | ref         |      |      |       |
| Approx. 8 cm                                 | 448 | 55.0  | 0.85        | 0.59 | 1.21 | 0.359 |
| Approx. > 8 cm                               | 0   | 0.0   | -           | -    | -    | -     |
| <b>Sward height (Last month of T3)</b>       |     |       |             |      |      |       |
| Approx. 3 cm                                 | 656 | 80.5  | ref         |      |      |       |
| Approx. 8 cm                                 | 0   | 0.0   | -           | -    | -    | -     |
| Approx. > 8 cm                               | 159 | 19.5  | 1.16        | 0.62 | 2.16 | 0.646 |
| <b>Rainfall (calendar month of visit)</b>    | 815 | 100.0 | 1.01        | 1.01 | 1.01 | 0.297 |
| <b>Temperature (calendar month of visit)</b> | 815 | 100.0 | 1.23        | 0.72 | 2.11 | 0.454 |



CI: confidence interval for odds ratio; bold odds ratios are statistically significant at 0.05 as their CIs do not include 1; ref: baseline category for comparison.

**Table S9.** Univariable analyses of the associations with the recovery from WLD at foot-level for 401 observations of 200 ewes during transition period 3 (Jul 2020 – Sep 2020).

| Variable                                        | <i>n</i> | %    | Odds ratio   | Lower 95% CI | Upper 95% CI | <i>p</i> |
|-------------------------------------------------|----------|------|--------------|--------------|--------------|----------|
| <b><i>Sheep-level variables</i></b>             |          |      |              |              |              |          |
| <b>Age</b>                                      |          |      |              |              |              |          |
| < 4 years                                       | 271      | 67.6 | ref          |              |              |          |
| ≥ 4 years                                       | 130      | 32.4 | 0.34         | 0.11         | 1.02         | 0.055    |
| <b>Change in BCS</b>                            |          |      |              |              |              |          |
| Same condition                                  | 177      | 44.1 | ref          |              |              |          |
| Gained condition                                | 130      | 32.4 | 0.46         | 0.15         | 1.36         | 0.161    |
| Lost condition                                  | 94       | 23.4 | 1.09         | 0.35         | 3.41         | 0.877    |
| <b><i>Foot-level variables</i></b>              |          |      |              |              |              |          |
| <b>Foot position</b>                            |          |      |              |              |              |          |
| Front                                           | 228      | 56.9 | ref          |              |              |          |
| Back                                            | 173      | 43.1 | 0.51         | 0.26         | 1.03         | 0.060    |
| <b>Other feet recover from WLD</b>              |          |      |              |              |              |          |
| None                                            | 274      | 68.3 | ref          |              |              |          |
| One other                                       | 82       | 20.4 | <b>6.63</b>  | 3.84         | 11.46        | <0.001   |
| Two others                                      | 34       | 8.5  | <b>6.81</b>  | 3.11         | 14.88        | <0.001   |
| Three others                                    | 11       | 2.7  | <b>12.29</b> | 3.09         | 48.85        | <0.001   |
| <b>Clinical disease (First month of T3)</b>     |          |      |              |              |              |          |
| No FR disease present                           | 389      | 97.0 | ref          |              |              |          |
| ID and/or SFR present                           | 12       | 3.0  | <b>1.21</b>  | 1.21         | 1.21         | <0.001   |
| <b>Clinical disease (Last month of T3)</b>      |          |      |              |              |              |          |
| No FR disease present                           | 339      | 84.5 | ref          |              |              |          |
| ID and/or SFR present                           | 62       | 15.5 | <b>0.16</b>  | 0.05         | 0.58         | 0.005    |
| <b><i>Farm-level variables</i></b>              |          |      |              |              |              |          |
| <b>Flock size</b>                               |          |      |              |              |              |          |
| < 500 ewes                                      | 96       | 23.9 | ref          |              |              |          |
| ≥ 500 ewes                                      | 305      | 49.4 | 0.48         | 0.16         | 1.42         | 0.185    |
| <b>Vaccination status</b>                       |          |      |              |              |              |          |
| Flock not vaccinated against footrot (Footvax®) | 245      | 61.1 | ref          |              |              |          |
| Flock vaccinated against footrot (Footvax®)     | 156      | 38.9 | 1.47         | 0.41         | 5.25         | 0.552    |
| <b>Soil type</b>                                |          |      |              |              |              |          |
| Loamy                                           | 96       | 23.9 | ref          |              |              |          |
| Clay                                            | 198      | 49.4 | 0.60         | 0.19         | 1.91         | 0.391    |
| Loamy/clay mix                                  | 107      | 26.7 | 0.32         | 0.09         | 1.18         | 0.088    |

|                                              |     |       |             |      |      |        |
|----------------------------------------------|-----|-------|-------------|------|------|--------|
| <b>Pasture moisture (First month of T3)</b>  |     |       |             |      |      |        |
| Dry (“hard”)                                 | 294 | 73.3  | ref         |      |      |        |
| Damp (“firm”)                                | 107 | 26.7  | 0.48        | 0.17 | 1.35 | 0.162  |
| Wet (“squelchy”)                             | 0   | 0.0   | -           | -    | -    | -      |
| Saturated (“boggy”)                          | 0   | 0.0   | -           | -    | -    | -      |
| <b>Pasture moisture (Last month of T3)</b>   |     |       |             |      |      |        |
| Dry (“hard”)                                 | 0   | 0.0   | -           | -    | -    | -      |
| Damp (“firm”)                                | 294 | 73.3  | ref         |      |      |        |
| Wet (“squelchy”)                             | 107 | 26.7  | 0.48        | 0.17 | 1.35 | 0.162  |
| Saturated (“boggy”)                          | 0   | 0.0   | -           | -    | -    | -      |
| <b>Pasture quality (First month of T3)</b>   |     |       |             |      |      |        |
| Lush (~ 90% leafy rye grasses)               | 256 | 63.8  | ref         |      |      |        |
| Average (~ 50% rye grasses)                  | 96  | 23.9  | <b>1.80</b> | 1.09 | 2.97 | 0.021  |
| Poor (mostly stalk and weeds)                | 49  | 12.2  | <b>3.39</b> | 1.81 | 6.36 | <0.001 |
| <b>Pasture quality (Last month of T3)</b>    |     |       |             |      |      |        |
| Lush (~ 90% leafy rye grasses)               | 305 | 76.1  | ref         |      |      |        |
| Average (~ 50% rye grasses)                  | 96  | 23.9  | 2.14        | 0.73 | 6.30 | 0.168  |
| Poor (mostly stalk and weeds)                | 0   | 0.0   | -           | -    | -    | -      |
| <b>Pasture type (First month of T3)</b>      |     |       |             |      |      |        |
| Permanent grassland                          | 49  | 12.2  | ref         |      |      |        |
| New grass ley                                | 0   | 0.0   | -           | -    | -    | -      |
| Mix permanent and new ley                    | 352 | 87.8  | <b>0.35</b> | 0.18 | 0.70 | 0.003  |
| <b>Pasture type (Last month of T3)</b>       |     |       |             |      |      |        |
| Permanent grassland                          | 49  | 12.2  | ref         |      |      |        |
| New grass ley                                | 0   | 0.0   | -           | -    | -    | -      |
| Mix permanent and new ley                    | 352 | 87.8  | <b>0.19</b> | 0.05 | 0.72 | 0.015  |
| <b>Sward height (First month of T3)</b>      |     |       |             |      |      |        |
| Approx. 3 cm                                 | 245 | 61.1  | ref         |      |      |        |
| Approx. 8 cm                                 | 156 | 38.9  | 1.40        | 0.57 | 3.40 | 0.465  |
| Approx. > 8 cm                               | 0   | 0.0   | -           | -    | -    | -      |
| <b>Sward height (Last month of T3)</b>       |     |       |             |      |      |        |
| Approx. 3 cm                                 | 252 | 62.8  | ref         |      |      |        |
| Approx. 8 cm                                 | 0   | 0.0   | -           | -    | -    | -      |
| Approx. > 8 cm                               | 149 | 37.2  | 0.41        | 0.16 | 1.09 | 0.074  |
| <b>Rainfall (calendar month of visit)</b>    | 401 | 100.0 | <b>0.97</b> | 0.97 | 0.98 | <0.001 |
| <b>Temperature (calendar month of visit)</b> | 401 | 100.0 | 2.17        | 0.77 | 6.15 | 0.144  |

CI: confidence interval for odds ratio; bold odds ratios are statistically significant at 0.05 as their CIs do not include 1; ref: baseline category for comparison.
